# Supplementary material
Source: MDPI journal article supplement (https://www.mdpi.com/2077-1312/10/3/339)
Supplement: s1 [file s1]

Article

# Making of Massoia Lactone-Loaded and Food-Grade Nanoemulsions and Their Bioactivities against a Pathogenic Yeast

Li Yuan <sup>1</sup>, Hong-Qian Zhang <sup>1</sup>, Zhe Chi <sup>1,2</sup>, Guang-Lei Liu <sup>1,2</sup> and Zhen-Ming Chi <sup>1,2,\*</sup>

<sup>1</sup> College of Marine Life Science, Ocean University of China, Yushan Road, No. 5, Qingdao 266003, China; ohnoyuan@163.com (L.Y.); 18801586@163.com (H.-Q.Z.); cz1108@ouc.edu.cn (Z.C.); liugl@ouc.edu.cn (G.-L.L.)

<sup>2</sup> Laboratory for Marine Biology and Biotechnology, Qingdao National Laboratory for Marine Science and Technology, Qingdao 266003, China

\* Correspondence: chi@ouc.edu.cn; Tel.: +86-532-82032266

**Table S1.** Various combinations for making the Massoia lactone loaded NEs.

| Surfactants      | The formed emulsion         | Particle size and PDI value |
|------------------|-----------------------------|-----------------------------|
| Tween-80+Span-80 | The stable NE for one week  | 66 ± 0.23 nm and 0.3 ± 0.1  |
| EL+ Span-80      | No NE formed                | —                           |
| Tween-20+Span-80 | The stable NEs for one week | 98 ± 1.5 nm, 0.32 ± 0.12    |

Data are given as mean ± SD, n = 3

**Citation:** Yuan, L.; Zhang, H.-Q.; Chi, Z.; Liu, G.-L.; Chi, Z.-M. Making of Massoia Lactone-Loaded and Food-Grade Nanoemulsions and Their Bioactivities against a Pathogenic Yeast. *J. Mar. Sci. Eng.* **2022**, *10*, 339. <https://doi.org/10.3390/jmse10030339>

Academic Editors: Francesco Tiralongo; Gioele Capillo and Armando Macali

Received: 28 January 2022

Accepted: 20 February 2022

Published: 1 March 2022

**Publisher's Note:** MDPI stays neutral with regard to jurisdictional claims in published maps and institutional affiliations.

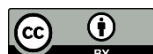

**Copyright:** © 2022 by the authors. Submitted for possible open access publication under the terms and conditions of the Creative Commons Attribution (CC BY) license (<https://creativecommons.org/licenses/by/4.0/>).

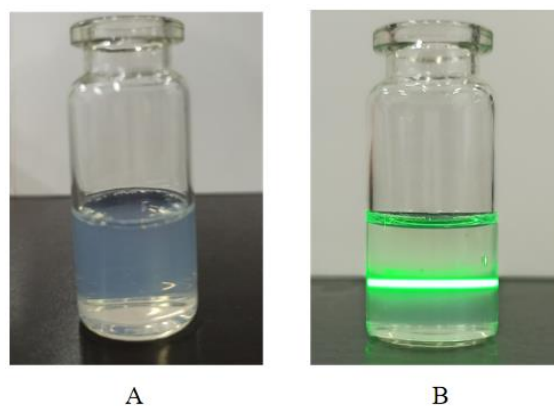

**Figure S1.** The appearance of the formed Massoia lactone loaded NEs (A) and the observed Tyndall phenomenon of them (B).

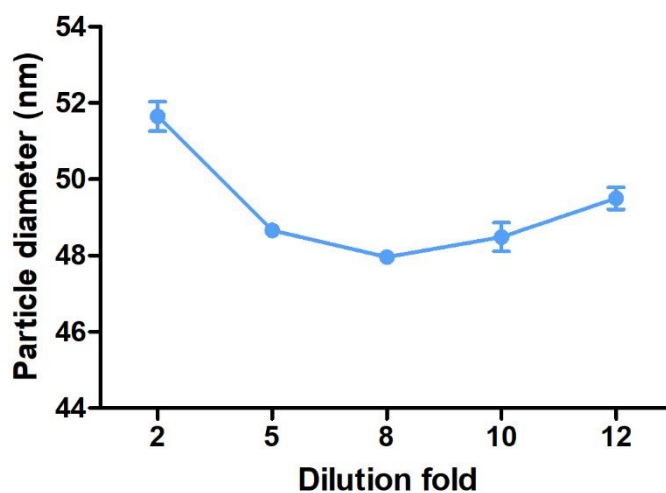

**Figure S2.** Stability of the Massoia lactone NEs during dilution. Data are given as mean  $\pm$  SD, n = 3.

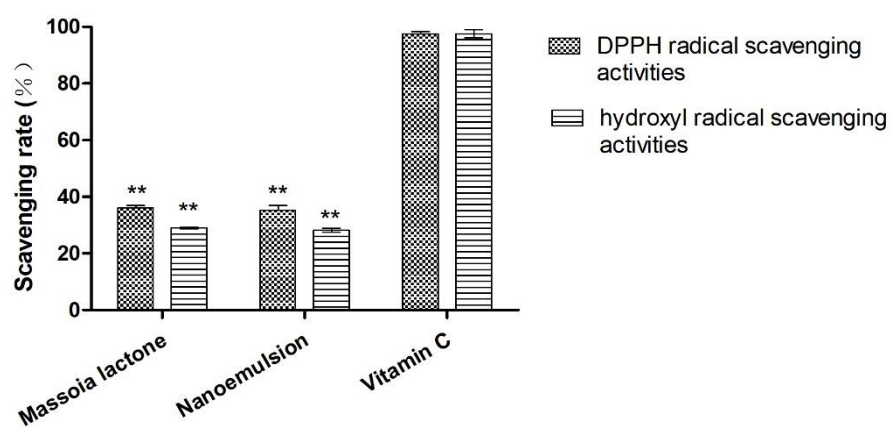

**Figure S3.** The DPPH radical scavenging activity and the hydroxyl radical scavenging activity of free Massoia lactone and Massoia lactone loaded NEs. Data are given as mean  $\pm$  SD, n = 3. Compared with scavenging rate of vitamin C, \*\* (p < 0.01) means the significant difference.
